# Supplementary material for: Rhamnan sulphate from green algae Monostroma nitidum improves constipation with gut microbiome alteration in double-blind placebo-controlled trial.
Source: Research Square preprint supplement (doi:10.21203/rs.3.rs-273210/v1), 2021-04-09
Supplement: Supplementary file 1 [file 7fef9955009b5fad36d39a0b.docx]

**Figure S1**


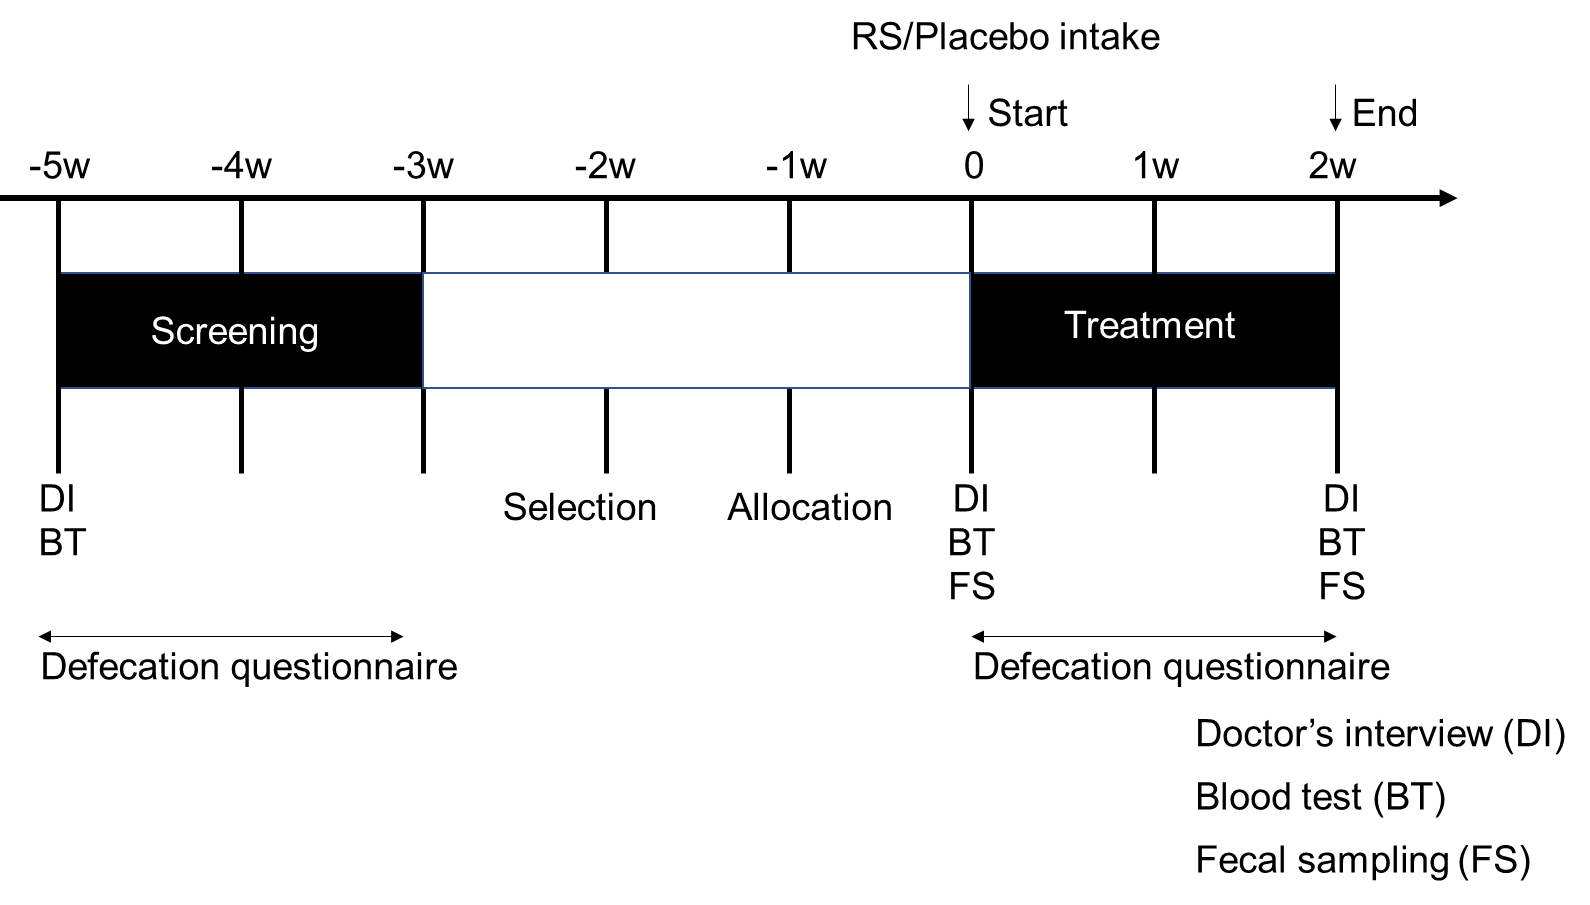


**Figure S1. Test schedule for human trial.**

**Figure S2**

**Figure S2. Flow chart of participant selection.**

**Figure S3**


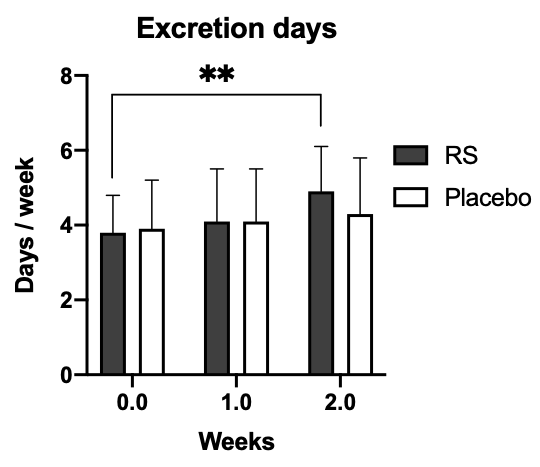


**Figure S3. RS increases excretion days per week.** ***p* < 0.01. *n* = 19, error bars indicate SD.

**Figure S4**


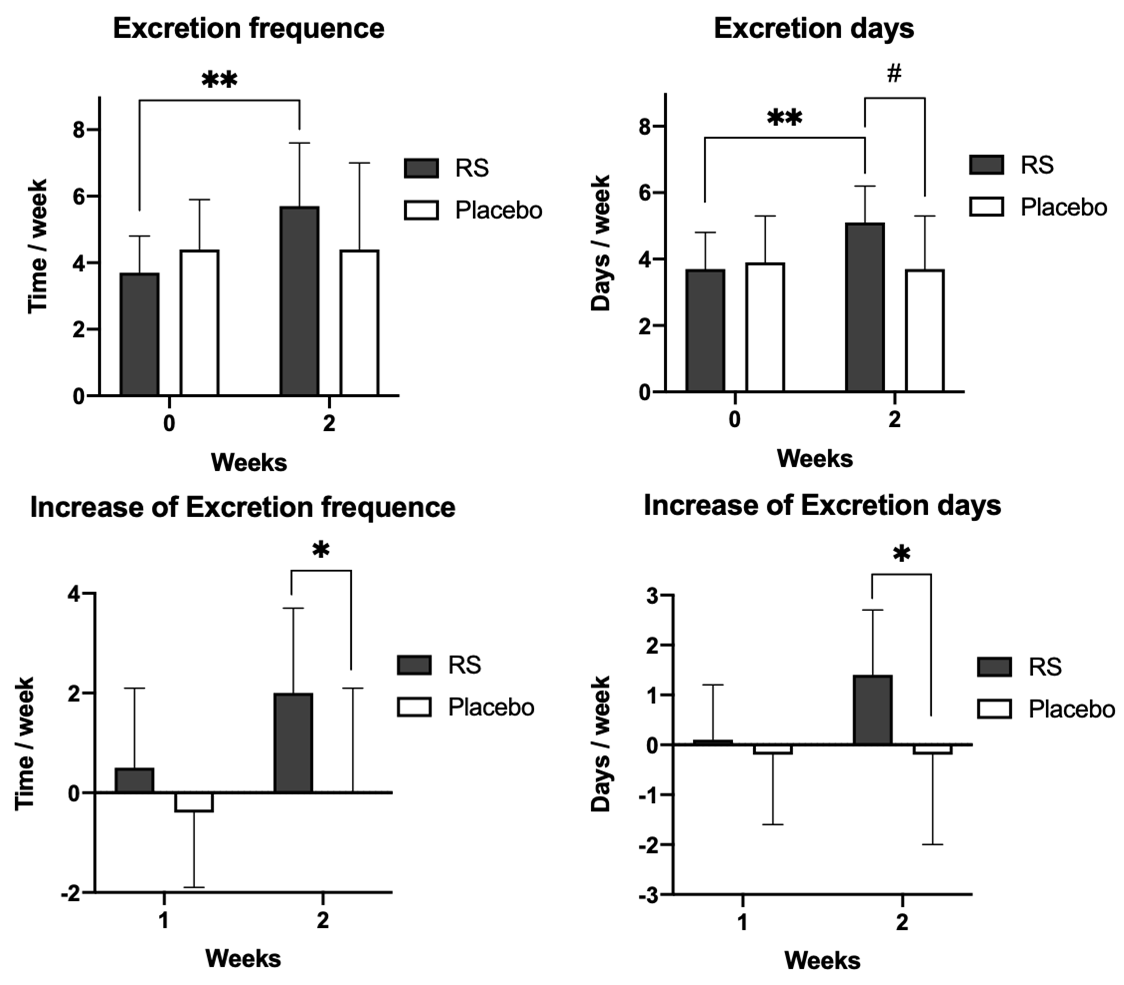


**Figure S4. Re-analysis of constipated phenotypes in high-diversity subjects,** **p < 0.05,* ***p* < 0.01 and #*p* < 0.05. *n* = 9–10, error bars indicate SD.
