# Supplementary material for: Rhamnan sulphate from green algae Monostroma nitidum improves constipation with gut microbiome alteration in double-blind placebo-controlled trial.
Source: Research Square preprint supplement (doi:10.21203/rs.3.rs-273210/v1), 2021-04-09
Supplement: Supplementary file 1 [file 13896b8a9fc14fd03fec5c2c.xlsx]

## Sheet: Sheet1
KEGG	RS*	Placebo*	ratio	Definition
map00900	1	11	0.0909091	Terpenoid backbone biosynthesis
map05130	1	11	0.0909091	Pathogenic Escherichia coli infection
map00550	1	10	0.1	Peptidoglycan biosynthesis
map00984	1	9	0.111111	Steroid degradation
map03070	4	35	0.114286	Bacterial secretion system
map00480	1	8	0.125	Glutathione metabolism
map00020	1	7	0.142857	Citrate cycle (TCA cycle)
map00906	1	6	0.166667	Carotenoid biosynthesis
map05150	1	6	0.166667	Staphylococcus aureus infection
map00130	3	16	0.1875	Ubiquinone and other terpenoid-quinone biosynthesis
map00982	1	5	0.2	Drug metabolism - cytochrome P450
map00010	3	14	0.214286	Glycolysis / Gluconeogenesis
map00030	3	14	0.214286	Pentose phosphate pathway
map00310	2	9	0.222222	Lysine degradation
map00220	2	8	0.25	Arginine biosynthesis
map00250	2	8	0.25	Alanine, aspartate and glutamate metabolism
map00710	1	4	0.25	Carbon fixation in photosynthetic organisms
map00980	1	4	0.25	Metabolism of xenobiotics by cytochrome P450
map05132	1	4	0.25	Salmonella infection
map05133	1	4	0.25	Pertussis
map00620	5	18	0.277778	Pyruvate metabolism
map02025	7	25	0.28	Biofilm formation - Pseudomonas aeruginosa
map00561	2	7	0.285714	Glycerolipid metabolism
map05131	2	7	0.285714	Shigellosis
map00910	5	16	0.3125	Nitrogen metabolism
map00311	1	3	0.333333	Penicillin and cephalosporin biosynthesis
map00460	1	3	0.333333	Cyanoamino acid metabolism
map00472	1	3	0.333333	D-Arginine and D-ornithine metabolism
map00626	1	3	0.333333	Naphthalene degradation
map00770	1	3	0.333333	Pantothenate and CoA biosynthesis
map00903	1	3	0.333333	Limonene and pinene degradation
map02030	2	6	0.333333	Bacterial chemotaxis
map03410	1	3	0.333333	Base excision repair
map05134	1	3	0.333333	Legionellosis
map05204	1	3	0.333333	Chemical carcinogenesis
map05225	1	3	0.333333	Hepatocellular carcinoma
map05418	1	3	0.333333	Fluid shear stress and atherosclerosis
map00640	8	23	0.347826	Propanoate metabolism
map01501	7	19	0.368421	beta-Lactam resistance
map00364	3	8	0.375	Fluorobenzoate degradation
map05100	3	8	0.375	Bacterial invasion of epithelial cells
map00760	5	13	0.384615	Nicotinate and nicotinamide metabolism
map05111	6	15	0.4	Biofilm formation - Vibrio cholerae
map00051	9	22	0.409091	Fructose and mannose metabolism
map01200	15	36	0.416667	Carbon metabolism
map00340	3	7	0.428571	Histidine metabolism
map00540	6	14	0.428571	Lipopolysaccharide biosynthesis
map01503	9	20	0.45	Cationic antimicrobial peptide (CAMP) resistance
map01110	66	146	0.452055	Biosynthesis of secondary metabolites
map00650	10	22	0.454545	Butanoate metabolism
map00790	5	11	0.454545	Folate biosynthesis
map01212	5	11	0.454545	Fatty acid metabolism
map00350	9	19	0.473684	Tyrosine metabolism
map02026	10	21	0.47619	Biofilm formation - Escherichia coli
map02010	53	111	0.477477	ABC transporters
map01100	282	567	0.497354	Metabolic pathways
*The values indicate the numbers of KOs in each pathway.
