# Supplementary material for: Rhamnan sulphate from green algae Monostroma nitidum improves constipation with gut microbiome alteration in double-blind placebo-controlled trial.
Source: Research Square preprint supplement (doi:10.21203/rs.3.rs-273210/v1), 2021-04-09
Supplement: Supplementary file 2 [file a9f5ddfcedfbce7624adea5e.xlsx]

## Sheet: Sheet1
													p value (RS vs. placebo)	p value (0w vs. 2w)
Phylum	Class	Order	Family	Time point	RS*				Placebo*					RS	Placebo
Actinobacteria	Actinobacteria	Bifidobacteriales	Bifidobacteriaceae	0W	1.75141	±	3.3141		3.38583	±	5.24193		0.267721	-	-
				2W	1.22922	±	1.47247		1.14268	±	1.83495		0.875632	0.398101	0.046406
Bacteroidetes	Bacteroidia	Bacteroidales	Bacteroidaceae	0W	30.6063	±	15.0917		24.1058	±	10.4029		0.134361	-	-
				2W	32.1442	±	14.5265		29.6941	±	12.6913		0.587723	0.527718	0.0137197
			Muribaculaceae	0W	0.519604	±	0.541417		0.439841	±	0.414781		0.616928	-	-
				2W	0.457	±	0.391578		0.673885	±	0.511153		0.157948	0.585905	0.00815452
Firmicutes	Clostridia	Clostridiales	Mogibacterium	0W	0.168839	±	0.243415		0.299569	±	0.597115		0.394057	-	-
				2W	0.0881677	±	0.160216		0.139392	±	0.153171		0.326917	0.00987757	0.164662
	Negativicutes	Acidaminococcales	Acidaminococcaceae	0W	1.92815	±	2.98179		1.33168	±	1.8153		0.464526	-	-
				2W	3.17943	±	3.64		1.93088	±	2.58297		0.234973	0.00460938	0.0906659
		Veillonellales	Veillonellaceae	0W	1.69291	±	2.27883		1.15535	±	1.33632		0.384292	-	-
				2W	2.69771	±	2.44906		2.68644	±	3.93663		0.991772	0.0345324	0.0429324
Proteobacteria	Betaproteobacteria	Burkholderiales	Sutterellaceae	0W	2.52888	±	2.20023		1.14747	±	1.20224		0.0225014	-	-
				2W	3.09082	±	3.05198		2.56857	±	2.87682		0.595466	0.219089	0.0180218
Tenericutes	Mollicutes	PAC001057	PAC001057	0W	0.237756	±	0.459626		0.224662	±	0.856744		0.954512	-	-
				2W	0.0482153	±	0.100636		0.344893	±	1.47431		0.400422	0.0432726	0.415902
*The values indicate %
